# Supplementary material for: Natural Coevolution of Tumor and Immunoenvironment in Glioblastoma
Source: Oxford University Press journal article supplement (doi:10.1158/2159-8290.cd-22-0196), 2022-09-19
Supplement: cd-22-0196_supplementary_table_1_suppst1.xlsx [file cd-22-0196_supplementary_table_1_suppst1.xlsx]

## Sheet: NES Gene Set
1. NES gene set
NES
S100A10
FOSL2
SPP1
CAV1
ANXA1
VIM
CD44
SERPINH1
LGALS3
CEBPB
ATF5
LGALS1

## Sheet: TCGA NES Score
2. NES score for TCGA IDH wild-type GBMs
Sample	NES
TCGA.27.1833.01	0.633906
TCGA.06.0881.01	0.921677
TCGA.27.1831.01	0.729002
TCGA.06.0238.01	0.626235
TCGA.06.0125.01	0.830147
TCGA.06.0216.01	0.756068
TCGA.08.0245.01	0.601658
TCGA.08.0373.01	0.908355
TCGA.28.5213.01	0.78453
TCGA.28.1760.01	0.893565
TCGA.14.0812.01	0.821542
TCGA.76.4932.01	0.582057
TCGA.06.5412.01	0.90947
TCGA.15.1446.01	0.748238
TCGA.16.1045.01	0.769093
TCGA.06.0141.01	0.844788
TCGA.12.0657.01	0.856874
TCGA.19.5960.01	0.605591
TCGA.28.1753.01	0.799942
TCGA.02.0038.01	0.491975
TCGA.06.0168.01	0.819423
TCGA.12.0821.01	0.708104
TCGA.32.1986.01	0.921135
TCGA.06.2567.01	0.764708
TCGA.27.2526.01	0.814
TCGA.19.1389.01	0.915955
TCGA.19.5951.01	0.845319
TCGA.06.0195.01	0.459038
TCGA.12.5295.01	0.744641
TCGA.12.3650.01	0.573481
TCGA.28.5220.01	0.752853
TCGA.32.2494.01	0.901326
TCGA.12.1602.01	0.888486
TCGA.02.0115.01	0.835616
TCGA.12.3653.01	0.522174
TCGA.08.0353.01	0.749495
TCGA.06.5856.01	0.788497
TCGA.06.0188.01	0.652418
TCGA.06.0174.01	0.731301
TCGA.12.0688.01	0.800352
TCGA.14.1794.01	0.871115
TCGA.27.1838.01	0.845829
TCGA.76.4926.01	0.929949
TCGA.32.1970.01	0.607566
TCGA.14.0789.01	0.90386
TCGA.26.5133.01	0.571159
TCGA.06.0206.01	0.91569
TCGA.19.2631.01	0.85258
TCGA.19.1790.01	1
TCGA.06.1084.01	0.821874
TCGA.19.2621.01	0.637153
TCGA.12.0707.01	0.867887
TCGA.08.0349.01	0.760083
TCGA.06.0138.01	0.745664
TCGA.28.5208.01	0.753131
TCGA.06.0171.01	0.622645
TCGA.32.4719.01	0.826927
TCGA.28.1757.01	0.886759
TCGA.06.2562.01	0.891688
TCGA.32.4211.01	0.928461
TCGA.12.5299.01	0.9112
TCGA.19.1386.01	0.638046
TCGA.19.1786.01	0.728585
TCGA.32.2638.01	0.83217
TCGA.27.2527.01	0.824927
TCGA.06.5408.01	0.850221
TCGA.76.6285.01	0.777559
TCGA.08.0357.01	0.800001
TCGA.08.0386.01	0.736573
TCGA.28.1749.01	0.739727
TCGA.27.1836.01	0.577189
TCGA.02.0025.01	0.929285
TCGA.26.5132.01	0.913628
TCGA.12.0692.01	0.788389
TCGA.06.0876.01	0.813112
TCGA.08.0359.01	0.816915
TCGA.08.0389.01	0.609189
TCGA.06.0241.01	0.628764
TCGA.06.5410.01	0.964748
TCGA.19.5958.01	0.683005
TCGA.19.2625.01	0.847136
TCGA.06.2565.01	0.677999
TCGA.02.2485.01	0.76604
TCGA.06.0213.01	0.81858
TCGA.12.1599.01	0.8527
TCGA.06.0750.01	0.809284
TCGA.02.0015.01	0.917059
TCGA.12.0656.01	0.80288
TCGA.12.1597.01	0.606753
TCGA.06.5418.01	0.94292
TCGA.02.0011.01	0.12924
TCGA.08.0345.01	0.857274
TCGA.06.0132.01	0.667485
TCGA.28.1747.01	0.657812
TCGA.12.0616.01	0.742492
TCGA.06.5415.01	0.758622
TCGA.06.0157.01	0.711347
TCGA.12.0620.01	0.841293
TCGA.06.2561.01	0.773236
TCGA.14.2554.01	0.813073
TCGA.02.0084.01	0.750104
TCGA.06.2563.01	0.622566
TCGA.14.1453.01	0.727826
TCGA.06.0127.01	0.759091
TCGA.06.0173.01	0.86386
TCGA.06.0219.01	0.712507
TCGA.28.5219.01	0.851599
TCGA.02.0114.01	0.665055
TCGA.14.3476.01	0.663511
TCGA.06.0145.01	0.752628
TCGA.76.4934.01	0.661781
TCGA.32.5222.01	0.760216
TCGA.32.4209.01	0.919555
TCGA.76.6191.01	0.747672
TCGA.02.0021.01	0.621686
TCGA.14.0787.01	0.734076
TCGA.02.0057.01	0.811395
TCGA.12.0618.01	0.711926
TCGA.26.1799.01	0.741733
TCGA.14.1827.01	0.646192
TCGA.27.2524.01	0.927998
TCGA.19.1791.01	0.386102
TCGA.28.5215.01	0.935544
TCGA.06.0875.01	0.582583
TCGA.06.0877.01	0.886966
TCGA.32.4213.01	0.84622
TCGA.06.0155.01	0.896162
TCGA.19.2620.01	0.808454
TCGA.28.2502.01	0.902822
TCGA.41.4097.01	0.864014
TCGA.02.0001.01	0.932944
TCGA.02.2466.01	0.640306
TCGA.02.0116.01	0.872471
TCGA.14.1037.01	0.907841
TCGA.15.0742.01	0.77473
TCGA.27.2528.01	0.754491
TCGA.19.5950.01	0.842694
TCGA.02.0043.01	0.859563
TCGA.32.4210.01	0.608453
TCGA.06.0187.01	0.869204
TCGA.02.2486.01	0.876925
TCGA.16.0846.01	0.623784
TCGA.32.1980.01	0.809838
TCGA.26.5134.01	0.663774
TCGA.06.0169.01	0.894258
TCGA.06.0649.01	0.800227
TCGA.28.5209.01	0.832335
TCGA.76.4929.01	0.846226
TCGA.06.0137.01	0.877141
TCGA.28.2506.01	0.457312
TCGA.14.0867.01	0.869621
TCGA.06.0744.01	0.754615
TCGA.02.0024.01	0.84455
TCGA.02.0054.01	0.72546
TCGA.08.0358.01	0.590334
TCGA.32.2632.01	0.773994
TCGA.08.0360.01	0.911145
TCGA.14.1455.01	0.630481
TCGA.19.5955.01	0.888974
TCGA.06.0645.01	0.880892
TCGA.02.0086.01	0.880783
TCGA.02.0033.01	0.729181
TCGA.27.2518.01	0.688849
TCGA.02.0075.01	0.908049
TCGA.12.0775.01	0.923648
TCGA.02.0083.01	0.818075
TCGA.19.2624.01	0.565005
TCGA.02.0074.01	0.744452
TCGA.08.0351.01	0.66427
TCGA.12.1089.01	0.600332
TCGA.06.5858.01	0.873887
TCGA.28.1746.01	0.568789
TCGA.12.0822.01	0.782782
TCGA.06.2564.01	0.759935
TCGA.08.0347.01	0.849099
TCGA.08.0355.01	0.792067
TCGA.41.2571.01	0.72174
TCGA.02.0070.01	0.903684
TCGA.02.0113.01	0.756549
TCGA.02.0069.01	0.443076
TCGA.76.6193.01	0.975833
TCGA.02.0009.01	0.832453
TCGA.06.0148.01	0.917114
TCGA.12.0773.01	0.841288
TCGA.41.2575.01	0.530013
TCGA.06.0133.01	0.556478
TCGA.27.1832.01	0.915285
TCGA.02.0079.01	0.956055
TCGA.28.5218.01	0.928815
TCGA.14.0786.01	0.75556
TCGA.06.1800.01	0.910327
TCGA.76.4935.01	0.840613
TCGA.14.1795.01	0.851778
TCGA.06.5414.01	0.8513
TCGA.06.5411.01	0.633347
TCGA.06.0211.01	0.771134
TCGA.12.0826.01	0.70761
TCGA.14.1829.01	0.763689
TCGA.06.0122.01	0.910039
TCGA.12.0828.01	0.758492
TCGA.08.0246.01	0.963409
TCGA.06.0126.01	0.632879
TCGA.08.0348.01	0.757528
TCGA.26.5139.01	0.901076
TCGA.81.5910.01	0.82816
TCGA.41.3393.01	0.859641
TCGA.28.5214.01	0.765099
TCGA.32.2615.01	0.857145
TCGA.27.1834.01	0.800315
TCGA.06.0154.01	0.894287
TCGA.06.0178.01	0.651648
TCGA.06.0190.01	0.899087
TCGA.06.0158.01	0.792921
TCGA.06.0208.01	0.659846
TCGA.06.6391.01	0.649741
TCGA.12.1600.01	0.662155
TCGA.14.0817.01	0.749994
TCGA.02.0052.01	0.827186
TCGA.19.2619.01	0.774735
TCGA.12.1088.01	0.864575
TCGA.02.0107.01	0.894116
TCGA.06.0648.01	0.789443
TCGA.28.5204.01	0.608058
TCGA.06.0745.01	0.779018
TCGA.06.1804.01	0.681453
TCGA.26.1439.01	0.776896
TCGA.06.0201.01	0.924533
TCGA.76.4931.01	0.922049
TCGA.12.0819.01	0.641292
TCGA.14.1823.01	0.840303
TCGA.28.6450.01	0.805615
TCGA.02.0007.01	0.576807
TCGA.19.1390.01	0.363944
TCGA.06.0156.01	0.817798
TCGA.06.0237.01	0.556887
TCGA.19.1385.01	0.900207
TCGA.76.4928.01	0.908259
TCGA.06.0686.01	0.719075
TCGA.19.2623.01	0.877054
TCGA.06.0192.01	0.926113
TCGA.06.2558.01	0.684304
TCGA.28.1750.01	0.913562
TCGA.06.0644.01	0.949504
TCGA.06.0185.01	0.788503
TCGA.12.3646.01	0.646172
TCGA.76.6282.01	0.927565
TCGA.02.2470.01	0.877261
TCGA.19.5954.01	0.879245
TCGA.06.0743.01	0.718951
TCGA.06.0214.01	0.728161
TCGA.02.0003.01	0.869302
TCGA.32.1979.01	0.843997
TCGA.87.5896.01	0.793083
TCGA.06.1087.01	0.680315
TCGA.41.2573.01	0.620886
TCGA.08.0350.01	0.729797
TCGA.06.0166.01	0.798616
TCGA.06.0189.01	0.876603
TCGA.06.2569.01	0.357093
TCGA.19.0957.01	0.794071
TCGA.14.0865.01	0.459279
TCGA.08.0354.01	0.894429
TCGA.76.4925.01	0.349956
TCGA.14.1396.01	0.921379
TCGA.12.0778.01	0.911597
TCGA.28.1752.01	0.818386
TCGA.12.3649.01	0.697732
TCGA.14.0790.01	0.595567
TCGA.28.2514.01	0.69836
TCGA.02.0085.01	0.861982
TCGA.06.5859.01	0.639463
TCGA.12.1093.01	0.917422
TCGA.02.0046.01	0.815053
TCGA.06.0879.01	0.874681
TCGA.14.0871.01	0.631503
TCGA.08.0244.01	0.808371
TCGA.41.5651.01	0.578359
TCGA.76.6192.01	0.83205
TCGA.12.0619.01	0.871452
TCGA.02.0016.01	0.496302
TCGA.02.0071.01	0.886399
TCGA.32.1977.01	0.881803
TCGA.32.1991.01	0.887178
TCGA.06.0147.01	0.932171
TCGA.06.0176.01	0.947501
TCGA.06.0210.01	0.899628
TCGA.32.1982.01	0.743209
TCGA.26.5135.01	0.845711
TCGA.02.0099.01	0.857179
TCGA.28.5216.01	0.836508
TCGA.08.0390.01	0.892709
TCGA.19.1789.01	0.561554
TCGA.41.3392.01	0.823423
TCGA.02.0064.01	0.94047
TCGA.08.0380.01	0.718231
TCGA.06.0939.01	0.789806
TCGA.27.1835.01	0.367834
TCGA.06.0882.01	0.778744
TCGA.06.6390.01	0.762308
TCGA.06.2557.01	0.591094
TCGA.02.0068.01	0.891092
TCGA.06.1801.01	0.720458
TCGA.06.0124.01	0.916929
TCGA.28.2509.01	0.882646
TCGA.26.5136.01	0.968447
TCGA.19.5959.01	0.724333
TCGA.14.0813.01	0.841604
TCGA.14.1825.01	0.536957
TCGA.06.5413.01	0.801782
TCGA.19.5947.01	0.987436
TCGA.27.2523.01	0.632473
TCGA.41.3915.01	0.883694
TCGA.19.1388.01	0.645591
TCGA.12.0820.01	0.572489
TCGA.14.1034.01	0.849656
TCGA.06.2566.01	0.691677
TCGA.02.0089.01	0.857141
TCGA.06.0646.01	0.807827
TCGA.02.0048.01	0.528744
TCGA.06.0650.01	0.938688
TCGA.02.0060.01	0.864327
TCGA.19.5952.01	0.954409
TCGA.32.2634.01	0.745628
TCGA.06.0197.01	0.875656
TCGA.28.5207.01	0.654672
TCGA.08.0352.01	0.929379
TCGA.28.2513.01	0.907494
TCGA.28.1751.01	0.933996
TCGA.12.3651.01	0.497804
TCGA.32.2495.01	0.85567
TCGA.27.1830.01	0.852951
TCGA.06.0184.01	0.796796
TCGA.12.3652.01	0.64415
TCGA.28.1755.01	0.880647
TCGA.14.3477.01	0.457304
TCGA.06.2559.01	0.831478
TCGA.06.0747.01	0.839342
TCGA.06.0139.01	0.893484
TCGA.06.0152.01	0.77019
TCGA.76.4927.01	0.755346
TCGA.02.0104.01	0.254159
TCGA.12.0670.01	0.6669
TCGA.02.0004.01	0.927421
TCGA.12.3648.01	0.763075
TCGA.41.2572.01	0.788131
TCGA.06.0130.01	0.92304
TCGA.06.0749.01	0.657279
TCGA.19.4068.01	0.676863
TCGA.12.3644.01	0.765477
TCGA.12.0829.01	0.88548
TCGA.14.1451.01	0.833071
TCGA.12.5301.01	0.832623
TCGA.32.1976.01	0.702525
TCGA.27.2519.01	0.815141
TCGA.02.0102.01	0.861674
TCGA.02.0023.01	0.839117
TCGA.19.1387.01	0.837364
TCGA.02.0034.01	0.691936
TCGA.12.1598.01	0.775513
TCGA.06.0878.01	0.877056
TCGA.12.1092.01	0.835904
TCGA.08.0375.01	0.809464
TCGA.27.1837.01	0.673095
TCGA.08.0356.01	0.831066
TCGA.28.1745.01	0.746343
TCGA.32.2491.01	0.929065
TCGA.06.0143.01	0.905835
TCGA.08.0385.01	0.646729
TCGA.14.0781.01	0.936475
TCGA.02.0047.01	0
TCGA.02.0027.01	0.765543
