# Supplementary material for: Natural Coevolution of Tumor and Immunoenvironment in Glioblastoma
Source: Oxford University Press journal article supplement (doi:10.1158/2159-8290.cd-22-0196), 2022-09-19
Supplement: cd-22-0196_supplementary_table_2_suppst2.xlsx [file cd-22-0196_supplementary_table_2_suppst2.xlsx]

## Sheet: Sheet1
The mass cytometry antibodies.
markers
CD19
CD4
CD8
CD33
CD11c
CD56
CD16
CD206
CD3
CD11b
CD15
CD45
CX3CR1
PD-L1
Lag3
Tim3
PD-1
CTLA4
CD39
CD25
CD69
CD38
HLA-DR
ICOS
CD45RA
CD127
CD45RO
CCR7
CD146
P2ry12
CD204
CD169
CD68
CD28
CXCR3
CCR5
Granzyme B
CD31
CD144
CD133
CD34
CD44
