# Supplementary material for: Natural Coevolution of Tumor and Immunoenvironment in Glioblastoma
Source: Oxford University Press journal article supplement (doi:10.1158/2159-8290.cd-22-0196), 2022-09-19
Supplement: cd-22-0196_supplementary_table_4_suppst4.xlsx [file cd-22-0196_supplementary_table_4_suppst4.xlsx]

## Sheet: Sheet1
siRNA sequences for ANXA1
Gene	Sequence (5' -> 3')
control	TTCTCCGAACGTGTCACGT
ANXA1 (412) #1	ACTCCAGCGCAATTTGATG
ANXA1 (880) #2	CCTTACCACCAGAAGCTAT
ANXA1 (1113) #3	CCCGTTCTGAAATTGACAT
