# Supplementary material for: Natural Coevolution of Tumor and Immunoenvironment in Glioblastoma
Source: Oxford University Press journal article supplement (doi:10.1158/2159-8290.cd-22-0196), 2022-09-19
Supplement: cd-22-0196_supplementary_table_5_suppst5.xlsx [file cd-22-0196_supplementary_table_5_suppst5.xlsx]

## Sheet: M1-like
CD86
PrimerBank ID	332634933c1
Amplicon Size	133
	Sequence (5' -> 3')	Length	Tm	Location
Forward Primer	CTGCTCATCTATACACGGTTACC	23	60	468-490
Reverse Primer	GGAAACGTCGTACAGTTCTGTG	22	61.1	600-579
iNOS
PrimerBank ID	206597519c1
Amplicon Size	207
	Sequence (5' -> 3')	Length	Tm	Location
Forward Primer	TTCAGTATCACAACCTCAGCAAG	23	60.2	131-153
Reverse Primer	TGGACCTGCAAGTTAAAATCCC	22	60.5	337-316
IL-1b
PrimerBank ID	27894305c1
Amplicon Size	132
	Sequence (5' -> 3')	Length	Tm	Location
Forward Primer	ATGATGGCTTATTACAGTGGCAA	23	60	31-53
Reverse Primer	GTCGGAGATTCGTAGCTGGA	20	60.8	162-143
TNF
ID: 7124
PrimerBank ID	25952110c2
Amplicon Size	91
	Sequence (5' -> 3')	Length	Tm	Location
Forward Primer	GAGGCCAAGCCCTGGTATG	19	62.1	556-574
Reverse Primer	CGGGCCGATTGATCTCAGC	19	62.9	646-628

## Sheet: M2-like
Primer sequences for PCR.
CD206 MRC1
PrimerBank ID	145312260c1
Amplicon Size	211
	Sequence (5' -> 3')	Length	Tm	Location
Forward Primer	TCCGGGTGCTGTTCTCCTA	19	61.9	39-57
Reverse Primer	CCAGTCTGTTTTTGATGGCACT	22	61	249-228
ARG1
PrimerBank ID	346986433c1
Amplicon Size	76
	Sequence (5' -> 3')	Length	Tm	Location
Forward Primer	GTGGAAACTTGCATGGACAAC	21	60	410-430
Reverse Primer	AATCCTGGCACATCGGGAATC	21	62.2	485-465
CD36
PrimerBank ID	188536061c1
Amplicon Size	92
	Sequence (5' -> 3')	Length	Tm	Location
Forward Primer	GGCTGTGACCGGAACTGTG	19	62.9	4-22
Reverse Primer	AGGTCTCCAACTGGCATTAGAA	22	60.8	95-74
IL10
ID: 3586
PrimerBank ID	24430216c1
Amplicon Size	112
	Sequence (5' -> 3')	Length	Tm	Location
Forward Primer	GACTTTAAGGGTTACCTGGGTTG	23	60.5	217-239
Reverse Primer	TCACATGCGCCTTGATGTCTG	21	63	328-308
GAPDH
PrimerBank ID	378404907c1
Amplicon Size	197
	Sequence (5' -> 3')	Length	Tm	Location
Forward Primer	GGAGCGAGATCCCTCCAAAAT	21	61.6	108-128
Reverse Primer	GGCTGTTGTCATACTTCTCATGG	23	60.9	304-282
